# Supplementary material
Source: Research Square preprint supplement (doi:10.21203/rs.3.rs-10090678/v1)
Supplement: Supplementary file 1 [file 6f62d46723eb230126e92353.pdf]

## STROBE Statement—Checklist of Items for Cross-Sectional Studies

**Manuscript Title:** Cardiovascular Risk in Systemic Lupus Erythematosus: A Cross-Sectional Analysis of NHANES 2001–2023

**Authors:** Alvine Ciananga Ciondo, MD; Gerlence Munimba Kambere, MD

| Item No.                  | Recommendation                                                                                      | Reported on<br>Page / Section | Comments                                                                                                      |
|---------------------------|-----------------------------------------------------------------------------------------------------|-------------------------------|---------------------------------------------------------------------------------------------------------------|
| <b>Title and abstract</b> |                                                                                                     |                               |                                                                                                               |
| <b>1</b>                  | (a) Indicate the study's design with a commonly used term in the title or the abstract              | Title, Abstract (Background)  | "Cross-Sectional Analysis" explicitly stated                                                                  |
|                           | (b) Provide in the abstract an informative and balanced summary of what was done and what was found | Abstract                      | Structured abstract with Background, Methods, Results, Conclusions                                            |
| <b>Introduction</b>       |                                                                                                     |                               |                                                                                                               |
| <b>2</b>                  | Explain the scientific background and rationale for the investigation being reported                | Introduction, paragraphs 1–3  | Describes SLE epidemiology, cardiovascular burden, Manzi et al. findings, and limitations of existing studies |
| <b>3</b>                  | State specific objectives, including any prespecified hypotheses                                    | Introduction, final paragraph | Primary objective: quantify adjusted odds of cardiovascular outcomes;<br>Secondary:                           |

|                |                                                                                                                                          |                                                    |                                                                                                                    |
|----------------|------------------------------------------------------------------------------------------------------------------------------------------|----------------------------------------------------|--------------------------------------------------------------------------------------------------------------------|
|                |                                                                                                                                          |                                                    | characterize risk profile and age-specific vulnerability windows                                                   |
| <b>Methods</b> |                                                                                                                                          |                                                    |                                                                                                                    |
| <b>4</b>       | Present key elements of study design early in the paper                                                                                  | Methods, "Study Design and Data Source"            | Cross-sectional analysis of pooled NHANES cycles (2001–2023)                                                       |
| <b>5</b>       | Describe the setting, locations, and relevant dates, including periods of recruitment, exposure, follow-up, and data collection          | Methods, "Study Design and Data Source"            | 11 NHANES cycles listed with years; US non-institutionalized civilian population                                   |
| <b>6</b>       | (a) Give the eligibility criteria, and the sources and methods of selection of participants                                              | Methods, "Study Population and SLE Classification" | Age $\geq 18$ years; complete data for MCQ191; self-reported physician diagnosis of SLE                            |
|                | (b) For matched studies, give matching criteria and number of exposed and unexposed                                                      | Not applicable                                     | Not a matched study design                                                                                         |
| <b>7</b>       | Clearly define all outcomes, exposures, predictors, potential confounders, and effect modifiers. Give diagnostic criteria, if applicable | Methods, "Outcome Variables," "Covariates"         | Cardiovascular outcomes defined with NHANES variable codes (MCQ160E, MCQ160B, MCQ160F, MCQ160C); covariates listed |

|           |                                                                                                                                                                                      |                                                    |                                                                                                               |
|-----------|--------------------------------------------------------------------------------------------------------------------------------------------------------------------------------------|----------------------------------------------------|---------------------------------------------------------------------------------------------------------------|
|           |                                                                                                                                                                                      |                                                    | (age, sex, race/ethnicity, BMI, smoking, BP, lipids)                                                          |
| <b>8</b>  | For each variable of interest, give sources of data and details of methods of assessment (measurement). Describe comparability of assessment methods if there is more than one group | Methods, "Outcome Variables"                       | Self-reported physician diagnosis for all outcomes; identical ascertainment for SLE and non-SLE groups        |
| <b>9</b>  | Describe any efforts to address potential sources of bias                                                                                                                            | Methods, "Statistical Analysis"                    | Complex survey weights used; multivariable adjustment for age, sex, race/ethnicity                            |
| <b>10</b> | Explain how the study size was arrived at                                                                                                                                            | Methods, "Study Population and SLE Classification" | All eligible NHANES participants across 11 cycles; final N = 103,284 (316 SLE, 102,968 non-SLE)               |
| <b>11</b> | Explain how quantitative variables were handled in the analyses. If applicable, describe which groupings were chosen and why                                                         | Methods, "Statistical Analysis"                    | Age as continuous in adjusted models; age strata (<40, 40–59, ≥60 years) prespecified for stratified analysis |

|                |                                                                                                                                                                              |                                                                                         |                                                                                                                                 |
|----------------|------------------------------------------------------------------------------------------------------------------------------------------------------------------------------|-----------------------------------------------------------------------------------------|---------------------------------------------------------------------------------------------------------------------------------|
| <b>12</b>      | (a) Describe all statistical methods, including those used to control for confounding                                                                                        | Methods, "Statistical Analysis"                                                         | Survey-weighted logistic regression; adjustment for age, sex, race/ethnicity                                                    |
|                | (b) Describe any methods used to examine subgroups and interactions                                                                                                          | Methods, "Statistical Analysis"                                                         | Age-stratified relative risks computed across three prespecified age strata                                                     |
|                | (c) Explain how missing data were addressed                                                                                                                                  | Methods, "Study Population and SLE Classification"                                      | Participants with missing SLE indicator (MCQ191 codes 3, 4, 7, 9) excluded                                                      |
|                | (d) If applicable, describe analytical methods taking account of sampling strategy                                                                                           | Methods, "Statistical Analysis"                                                         | NHANES complex survey design incorporated using R <i>survey</i> package; weights adjusted per NCHS guidelines for pooled cycles |
|                | (e) Describe any sensitivity analyses                                                                                                                                        | Not reported                                                                            | No sensitivity analyses conducted                                                                                               |
| <b>Results</b> |                                                                                                                                                                              |                                                                                         |                                                                                                                                 |
| <b>13</b>      | (a) Report numbers of individuals at each stage of study—e.g., numbers potentially eligible, examined for eligibility, confirmed eligible, included in the study, completing | Methods, "Study Population and SLE Classification"; Results, "Baseline Characteristics" | Final analytic sample: 316 SLE, 102,968 non-SLE; exclusions: age <18, missing MCQ191, invalid response codes                    |

|           |                                                                                                                                             |                                                           |                                                                                                                                 |
|-----------|---------------------------------------------------------------------------------------------------------------------------------------------|-----------------------------------------------------------|---------------------------------------------------------------------------------------------------------------------------------|
|           | follow-up, and analyzed                                                                                                                     |                                                           |                                                                                                                                 |
|           | (b) Give reasons for non-participation at each stage                                                                                        | Methods, "Study Population and SLE Classification"        | Participants with response codes 3, 4, 7, 9 or missing data excluded                                                            |
|           | (c) Consider use of a flow diagram                                                                                                          | Not included                                              | Flow diagram recommended for final submission                                                                                   |
| <b>14</b> | (a) Give characteristics of study participants (e.g., demographic, clinical, social) and information on exposures and potential confounders | Results, "Baseline Characteristics"; Table 1              | Age, sex, race/ethnicity, BMI, smoking, systolic BP, LDL-cholesterol reported                                                   |
|           | (b) Indicate number of participants with missing data for each variable of interest                                                         | Not explicitly reported                                   | Recommend adding missing data summary for final submission                                                                      |
| <b>15</b> | Report numbers of outcome events or summary measures                                                                                        | Results, "Prevalence of Cardiovascular Outcomes"; Table 2 | Prevalence of MI (11.9% vs. 5.4%), HF (7.8% vs. 3.7%), stroke (9.1% vs. 5.2%), CHD (8.3% vs. 5.4%), composite (22.9% vs. 15.5%) |
| <b>16</b> | (a) Give unadjusted estimates and, if applicable, confounder-adjusted estimates and their precision (e.g., 95%                              | Results, "Adjusted Odds Ratios"; Table 3                  | Crude and adjusted ORs presented; models adjusted for age, sex, race/ethnicity as                                               |

|                   |                                                                                                                                                            |                                                        |                                                                                                                                                |
|-------------------|------------------------------------------------------------------------------------------------------------------------------------------------------------|--------------------------------------------------------|------------------------------------------------------------------------------------------------------------------------------------------------|
|                   | confidence interval).<br>Make clear which confounders were adjusted for and why they were included                                                         |                                                        | stated in table footnote                                                                                                                       |
|                   | (b) Report category boundaries when continuous variables are categorized                                                                                   | Methods, "Statistical Analysis"                        | Age strata boundaries: <40, 40–59, ≥60 years                                                                                                   |
|                   | (c) If relevant, consider translating estimates of relative risk into absolute risk for a meaningful time period                                           | Not applicable                                         | Cross-sectional design; prevalence and ORs reported                                                                                            |
| <b>17</b>         | Report other analyses done—e.g., analyses of subgroups and interactions, and sensitivity analyses                                                          | Results, "Age-Stratified Cardiovascular Risk"; Table 4 | Age-stratified relative risks computed and reported with interpretive caveats for ≥60 years stratum                                            |
| <b>Discussion</b> |                                                                                                                                                            |                                                        |                                                                                                                                                |
| <b>18</b>         | Summarize key results with reference to study objectives                                                                                                   | Discussion, "Principal Findings"                       | Principal findings enumerated; each objective addressed                                                                                        |
| <b>19</b>         | Discuss limitations of the study, taking into account sources of potential bias or imprecision. Discuss both direction and magnitude of any potential bias | Discussion, "Strengths and Limitations"                | Cross-sectional design, self-reported SLE ascertainment, lack of disease activity/treatment data, modest SLE sample size, survival bias in ≥60 |

|                          |                                                                                                                                                                            |                                                |                                                                                                                                                  |
|--------------------------|----------------------------------------------------------------------------------------------------------------------------------------------------------------------------|------------------------------------------------|--------------------------------------------------------------------------------------------------------------------------------------------------|
|                          |                                                                                                                                                                            |                                                | years stratum explicitly discussed                                                                                                               |
| <b>20</b>                | Give a cautious overall interpretation of results considering objectives, limitations, multiplicity of analyses, results from similar studies, and other relevant evidence | Discussion, "Principal Findings," "Conclusion" | Findings contextualized with prior literature (Manzi et al., Joyce et al.); cautious causal language used; survival bias interpretation provided |
| <b>21</b>                | Discuss the generalizability (external validity) of the study results                                                                                                      | Discussion, "Strengths and Limitations"        | Nationally representative sampling; generalizable to US non-institutionalized adult population                                                   |
| <b>Other information</b> |                                                                                                                                                                            |                                                |                                                                                                                                                  |
| <b>22</b>                | Give the source of funding and the role of the funders for the present study and, if applicable, for the original study on which the present article is based              | Declarations, "Funding"                        | "No external funding was received for this study."                                                                                               |

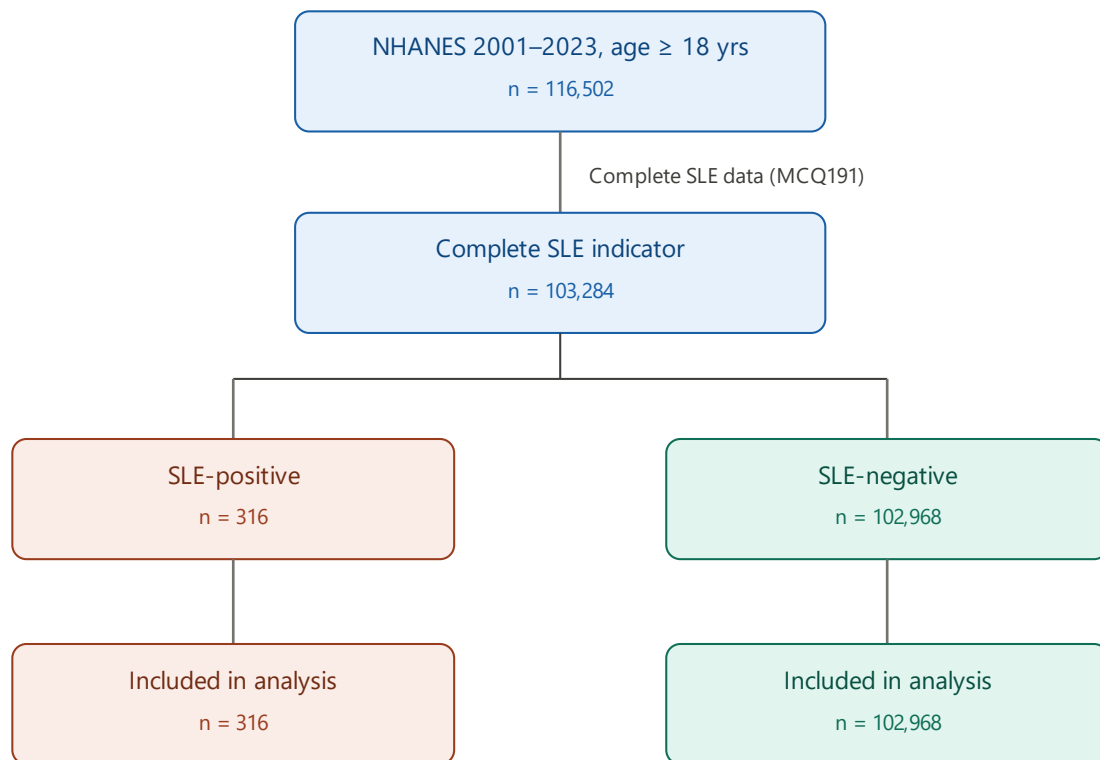

Total analytic sample: n = 103,284
